Banno et al., 2022

1 **Laminar Distribution of stimulus- and task-related variables related to auditory streaming in core and**  
2 **belt auditory cortex**

3  
4 **Abbreviated Title:** Neural correlates of streaming along the auditory pathway  
5  
6  
7  
8

9 Taku Banno<sup>1</sup>, Harry W. Shirley<sup>1</sup>, Yonatan I. Fishman<sup>2</sup>, and Yale E. Cohen<sup>1,3,4</sup>

10  
11 <sup>1</sup>Department of Otorhinolaryngology: Head and Neck Surgery, University of Pennsylvania School of  
12 Medicine, Philadelphia, PA 19104, USA

13 <sup>2</sup>Departments of Neurology and Neuroscience, Albert Einstein College of Medicine, Bronx NY 10461,  
14 USA

15 <sup>3</sup>Department of Neuroscience, University of Pennsylvania, Philadelphia, PA 19104, USA

16 <sup>4</sup>Department of Bioengineering, University of Pennsylvania, Philadelphia, PA 19104, USA  
17

18 **Corresponding author:**

19 Yale E. Cohen, PhD

20 Department of Otorhinolaryngology: Head and Neck Surgery, University of Pennsylvania School of  
21 Medicine, Philadelphia, PA 19104, USA

22 E-mail: [ycohen@pennmedicine.upenn.edu](mailto:ycohen@pennmedicine.upenn.edu)  
23

24 Number of pages: 39

25 Number of figures: 6

26 Number of tables: 0

27 Number of multimedia and 3D models: 0

28 Number of words: 211 (Abstract), 631 (Introduction), and 1488 (Discussion)  
29  
30

31 **Conflict of interest**

32 The authors declare no competing financial interests.  
33

34 **Acknowledgements**

35 This work was supported by the National Institutes of Health (NIDCD). We thank Dr. Jaejin Lee for help  
36 with behavioral training.  
37  
38

Banno et al., 2022

39 **Abstract**

40 Humans and non-human animals parse the auditory scene into distinct auditory objects or “streams” by  
41 grouping together stimuli with common features and segregating those with different features. This  
42 process is commonly called “auditory scene analysis”. Although previous studies have identified neural  
43 mechanisms in the primary (core) auditory cortex that may underlie auditory-stream segregation, we do  
44 not have a good understanding of the contribution of cortical regions outside of the core auditory cortex  
45 to stream segregation nor do we understand the laminar specificity of these contributions. To examine  
46 these issues, we recorded translaminar multiunit activity (MUA) from the core and belt auditory cortex in  
47 macaque monkeys while they participated in an auditory streaming task designed to provide an objective  
48 measure of auditory-stream segregation. We found that MUA encoded both the stimulus variables and  
49 the monkey’s behavioral choices related to our streaming task. Overall, core MUA was modulated more  
50 by the stimulus variables and the monkey’s choices than belt MUA. However, whereas neural correlates  
51 of these variables were uniformly distributed in the core auditory cortex, stimulus- and choice-related  
52 information was predominantly represented in the superficial and deep layers of belt, respectively. These  
53 findings support a differential representation of stimulus- and choice-related variables related to auditory  
54 scene analysis along the primate auditory cortical pathway.

55

Banno et al., 2022

56 **Significance Statement**

57 Auditory-stream segregation is a fundamental component of auditory scene analysis. To our knowledge,  
58 this is the first study to examine the neural correlates of auditory-stream segregation outside of the core  
59 auditory cortex in macaque monkeys and the first to examine the laminar specificity of these neural  
60 correlates. We recorded neural responses while monkeys performed a new task for non-human primates  
61 designed to objectively test auditory-stream segregation. We found that neural responses reflecting  
62 stimulus- and behavior-related variables (i.e., the monkeys' choices) were differentially represented in  
63 the core and belt regions of the auditory cortex and across different cortical layers. These findings support  
64 a non-uniform representation of stimulus- and behavior-related variables related to auditory scene  
65 analysis along the primate auditory cortical pathway.

66

Banno et al., 2022

## 67 **Introduction**

68 A fundamental goal of the auditory system is to transform complex auditory stimuli into perceptual  
69 representations of sound sources in the environment, a process which is commonly called “auditory scene  
70 analysis” (Bregman, 1990). One important component of this transformation is “auditory-stream  
71 segregation”, which involves the grouping of stimuli that have similar spectrotemporal features (e.g.,  
72 frequency) into one perceptual representation and the concomitant segregation of stimuli that have  
73 different features into different perceptual representations. For example, while listening to two  
74 interleaved temporal sequences of tone bursts, listeners often report hearing one auditory stream when  
75 the frequency separation between the two sequences is small. However, as the frequency separation  
76 increases, listeners would be more likely to report hearing two auditory streams. This segregation of  
77 multiple overlapping and interleaved sequences of tone bursts into distinct perceptual representations or  
78 auditory streams underlies our ability to track a friend’s voice in a crowded restaurant or to follow the  
79 melody played by a particular instrument during a concert.

80 Although behavioral aspects of auditory-stream segregation have been studied extensively (see  
81 Moore and Gockel, 2012; Denham and Winkler, 2020; Oh et al., 2022 for review), the neural bases of  
82 auditory-stream segregation still remain unclear. For example, because neurophysiological studies of  
83 auditory streaming have been largely restricted to the analysis of neural responses in the mammalian  
84 primary auditory cortex (Fishman et al., 2001a, 2004; Micheyl et al., 2005; Elhilali et al., 2009; Fishman  
85 and Steinschneider, 2010; Christison-Lagay and Cohen, 2018; Selezneva et al., 2018) or its avian analogue  
86 (Bee and Klump, 2004), we do not have a good understanding of the contribution of non-primary regions  
87 of auditory cortex (Kaas and Hackett, 2000) to auditory streaming and whether these different brain  
88 regions differentially contribute to streaming. Additionally, as most auditory streaming studies have been  
89 conducted in passively listening animals (Fishman et al., 2001a; Bee and Klump, 2004; Fishman et al., 2004;  
90 Micheyl et al., 2005; Elhilali et al., 2009; Lu et al., 2017; but see Christison-Lagay et al., 2018 and Selezneva

Banno et al., 2022

91 et al., 2018), the relationship between streaming behavior and simultaneous measures of neural activity  
92 has yet to be fully elucidated. Finally, except for important studies of auditory attention (Lakatos et al.,  
93 2005, 2008, 2009; Francis et al., 2018), the contributions of different cortical laminae to auditory behavior,  
94 especially in non-human primate models of hearing and in regions downstream from primary auditory  
95 cortex, have not been thoroughly characterized.

96 To address these outstanding issues, we examined the neural correlates of auditory streaming in  
97 rhesus macaque monkeys at two scales of analysis: cortical area and cortical lamina. We recorded  
98 simultaneously, via a multi-channel probe, from different cortical layers in the core or belt regions of the  
99 auditory cortex while monkeys performed a target detection task that provided an objective measure of  
100 auditory streaming (Sussman and Steinschneider, 2009). In this streaming task, monkeys listened to a  
101 temporal sequence of interleaved low- and high-frequency tone bursts and detected a deviantly loud  
102 “target” tone burst that was embedded in the low-frequency sequence (Fig. 1a). We found that multiunit  
103 activity (MUA) was sensitive to the stimulus variables of the task (i.e., the frequency values of the low-  
104 and high-frequency tone bursts). We also found that MUA was modulated by the monkeys’ behavioral  
105 choices (i.e., hits versus misses). Although MUA was modulated strongly in both the core and belt regions  
106 of the auditory cortex, the stimulus variables and the monkeys’ choices modulated MUA more in the core  
107 auditory cortex than in the belt. Further, the laminar distribution of these effects differed between the  
108 core and belt regions of the auditory cortex: whereas stimulus- and behavior-related modulations were  
109 widely distributed across cortical layers in the core, MUA in superficial layers of the belt was modulated  
110 more by stimulus variables, whereas MUA in deeper layers was modulated more by choice.

111

Banno et al., 2022

## 112 **Materials and Methods**

113 We conducted multilaminar extracellular recordings in two adult male macaque monkeys (*Macaca*  
114 *mulatta*; monkey D and monkey C) while they performed a task that objectively tested auditory streaming.  
115 The Institutional Animal Care and Use Committee of the University of Pennsylvania reviewed and  
116 approved all the procedures and protocols. We conducted all the surgeries under general anesthesia with  
117 aseptic techniques.

118

### 119 *Identification of core and belt auditory cortex*

120 We initially identified the locations of the core and belt regions of the auditory cortex through MRI scans  
121 of each monkey's brain and the stereotactic locations of these brain regions (Frey et al., 2004; Saleem and  
122 Logothetis, 2012). We functionally verified the anatomical location of each electrode penetration by  
123 generating and examining the cortical laminar profiles (as characterized by a current source density [CSD]  
124 analysis), calculating the spectrotemporal receptive field (STRF) at each recording site, and constructing  
125 tonotopic gradients.

126

### 127 *Experimental chamber*

128 We conducted behavioral and recording sessions in a darkened room with echo- and sound-attenuating  
129 walls. We seated a monkey in a primate chair with a touch-sensitive lever (monkey D) or joystick (monkey  
130 C); the monkey released a lever or moved a joystick to indicate their behavioral report. We stabilized the  
131 monkey's head position with a non-invasive head restraint (Drucker et al., 2015). We presented auditory  
132 stimuli (RX6 or RX8; Tucker-Davis Technologies) through a calibrated speaker (TR-3 [Anthony Gallo  
133 Acoustics] or MSP5 [Yamaha]), which was positioned at eye level ~1 m in front of the monkeys.

134

Banno et al., 2022

135 *Auditory-streaming task*

136 In the auditory-streaming task, a monkey listened to two interleaved sequences of tone bursts (50-ms  
137 duration; 25-ms inter-burst interval). One sequence contained “low frequency” (L) tone bursts, and the  
138 other sequence contained “high frequency” (H) tone bursts. We presented these tone bursts as a  
139 repeating sequence of L-H-H triplets (Fig. 1a), analogous to “ABB” triplets in other streaming studies (van  
140 Noorden, 1975; Cusack, 2005; Gutschalk et al., 2005; Micheyl et al., 2005; Sussman and Steinschneider,  
141 2009). The monkey reported (via lever release or joystick movement) a deviantly loud “target” tone burst  
142 that was part of the low-frequency tone-burst sequence. The frequency value of the low-frequency tone-  
143 burst sequence was held constant across trials, whereas the frequency value of the high-frequency tone-  
144 burst sequence varied trial by trial and ranged from 1-24 semitones above the low-frequency value (Fig.  
145 1A). This task is a modified version of a task used to evaluate auditory-stream segregation in human  
146 listeners (Sussman and Steinschneider, 2009).

147 We presented the low-frequency tone bursts at two sound levels: 52 or 68 dB SPL. In each trial, one  
148 low-frequency tone burst was presented at 68 dB, whereas all the other low-frequency tone bursts were  
149 presented at 52 dB. This 68-dB tone burst was, by definition, the deviant target. In contrast, we presented  
150 each of the high-frequency tone bursts at one of four different sound levels, which spanned a range above  
151 and below the levels of the low-frequency bursts: 47, 57, 62, and 72 dB SPL. The sound level of each high-  
152 frequency tone burst was chosen randomly from these 4 values.

153 We titrated task difficulty by varying the frequency separation ( $\Delta F$ ) between the low- and high-  
154 frequency tone-burst sequences (Fig. 1a). Because the frequency value of the low-frequency tone-burst  
155 sequence was held constant across trials, whereas the frequency value of the high-frequency tone-burst  
156 sequence varied trial by trial and ranged from 1-24 semitones above the low-frequency value.

157 Because previous work suggests that monkeys report streaming stimuli in a manner comparable to  
158 human listeners (Izumi, 2002; Selezneva et al., 2012; Christison-Lagay and Cohen, 2014), we hypothesized

Banno et al., 2022

159 that changes in  $\Delta F$  would affect the monkeys' performance in a manner similar to human performance  
160 (Sussman and Steinschneider, 2009). Specifically, when the  $\Delta F$  between the two sequences was small, the  
161 low- and high-frequency tone-burst sequences would be perceptually integrated into a single auditory  
162 stream. As a result, the sound level of the target would be within the variability of the sound levels of the  
163 low- and high-frequency tone bursts and would be difficult to detect as being "deviantly loud". In contrast,  
164 when the  $\Delta F$  between the sequences was large, the sequences would perceptually segregate into two  
165 auditory streams and the target in the low-frequency tone-burst sequence would be more readily  
166 detectable: that is, the louder sound level of the 68-dB target would be more salient relative to the  
167 "background" of the softer 52-dB tone bursts.

168 To minimize the possibility that monkeys could guess and anticipate target onset without actually  
169 detecting it, we randomized the time of target onset between 675 and 2025 ms, relative to sequence  
170 onset. In other words, the target tone burst could appear in any position between the 4<sup>th</sup> and the 10<sup>th</sup> L-  
171 H-H triplet. The target was never presented prior to the onset of the 4<sup>th</sup> L-H-H triplet.

172 If the monkey responded within a specified temporal window following target onset (monkey D:  
173 window = 650 ms; median response time between target onset and movement:  $431 \pm 81$  ms; monkey C:  
174 window = 800 ms; median response time:  $517 \pm 110$  ms), we considered the trial to be a "hit". If the  
175 monkey responded after this response window or did not respond at all, we considered the trial to be a  
176 "miss". A "false alarm" occurred when the monkey responded before target onset. Conservatively, we  
177 also considered very rapid responses (<200 ms for monkey D and <250 ms for monkey C) as false alarms.  
178 The target appeared only once in a trial; we did not include catch trials (i.e., trials without a target). We  
179 rewarded monkeys only on hit trials. For both miss and false-alarm trials, we added a timeout (1500-2500  
180 ms) to the inter-trial interval following these incorrect trials.

181



Banno et al., 2022

182 *Neurophysiological Recordings and Recording Strategy*

183 Because we were interested in examining lamina-specific modulations of neural activity related to  
184 auditory streaming, we oriented each monkey's recording chamber so that a linear multi-channel  
185 electrode (16-channel v-probe, 150- $\mu\text{m}$  spacing between channels; or a 24-channel s-probe, 100- $\mu\text{m}$   
186 spacing between channels; Plexon Inc.) would penetrate the auditory cortex perpendicular to its lamina.  
187 This orthogonal orientation further ensured that the spatial sampling of neural activity fulfilled the basic  
188 theoretical criteria required for the proper interpretation of one-dimensional CSD analysis (Müller-Preuss  
189 and Mitzdorf, 1984; Steinschneider et al., 1992).

190 At the beginning of each recording session, the electrode was inserted into the brain through a  
191 stainless-steel guide tube. The electrode was then advanced gradually with a microdrive (NAN  
192 Instruments). While advancing the electrode, we presented an auditory "search" stimulus (100-ms  
193 Gaussian noise burst; 10-ms  $\cos^2$  rise and fall times; 900 ms inter-burst-interval; sampling rate: 50 kHz) to  
194 identify auditory responsive sites. These neural signals were amplified (PZ2 and PZ5, Tucker Davis  
195 Technologies), digitized, and stored (RZ2, Tucker Davis Technologies; sampling rate: 24.4 kHz) for online  
196 and offline analyses.

197 Once we encountered sites responsive to the search stimulus, we finely adjusted the electrode's  
198 depth so that the largest stimulus-evoked MUA, which typically coincided with a prominent initial current  
199 sink in the CSD profile, was positioned in the electrode's middle channels (Fig. 2). MUA measures the  
200 summed spiking activity of local neurons within  $\sim 50\text{-}100\ \mu\text{m}$  of an electrode channel (Legatt et al., 1980;  
201 Brosch et al., 1997; Supèr and Roelfsema, 2005). We identified the initial current sink's location through  
202 both online and offline CSD analyses; see below. To minimize electrode drift during a recording session  
203 and artifactual components in the CSD profile (e.g., due to mechanical compression or distortion of the  
204 cortical tissue by the electrode), we retracted the electrode by  $\sim 200\text{-}450\ \mu\text{m}$  and allowed the tissue to  
205 stabilize for  $\geq 30$  minutes before continuing with data collection. Each recording session lasted about  $>90$

Banno et al., 2022

206 minutes. We confirmed that the electrode position remained relatively stable over the duration of each  
207 recording session by comparing the CSD profiles obtained before and after the task.

208 Next, while the monkey was passively listening, we presented a dynamic moving ripple (DMR)  
209 auditory stimulus and simultaneously collected neural activity. We presented this stimulus in order to  
210 generate each electrode channel's spectrotemporal receptive field (STRF); see below for more details.  
211 From the STRF, we calculated a site's "best frequency" (BF), which was used to determine the frequencies  
212 of the tone bursts presented in the auditory-streaming task: we set the value of the low-frequency tone-  
213 burst sequence to the BF of the recording site. In rare cases, when the BF was  $>3$  kHz, we set one of the  
214 high-frequency values (usually at the largest frequency separation  $[\Delta F]$ ) to this BF value. The monkey then  
215 performed the auditory-streaming task. On a trial-by-trial basis, we randomly varied the target onset and  
216 the  $\Delta F$ .

217

#### 218 Extraction of local-field potentials (LFPs) and calculation of the CSD

219 We extracted LFPs by low-pass filtering neural activity with a 4<sup>th</sup>-order bidirectional Butterworth filter  
220 (cutoff frequency: 0.3 kHz). From the LFPs, we derived the one-dimensional laminar CSD profile, as  
221 approximated by the second spatial derivative (relative to electrode-channel separation) of the  
222 simultaneously recorded LFPs across the electrode channels (Freeman and Nicholson, 1975; Nicholson  
223 and Freeman, 1975; Müller-Preuss and Mitzdorf, 1984; Fishman et al., 2001a; Fishman and  
224 Steinschneider, 2006). CSD characterizes the laminar pattern of net transmembrane current flow at each  
225 electrode channel and indicates whether a channel is near an extracellular current source or sink. A  
226 current sink reflects a region of net inward current and is usually generated by net excitatory synaptic  
227 activity or passive return from hyperpolarizing currents at adjacent sites. Conversely, a current source  
228 indicates net hyperpolarizing current or circuit-completing currents from regions of net depolarization.  
229 We also computed the average rectified CSD (AVREC; Mehta et al., 2000a, 2000b; Fishman and

Banno et al., 2022

230 Steinschneider, 2012) by full wave rectifying the CSD waveform at each electrode channel and then  
231 averaging these rectified waveforms across electrode channels.

232

### 233 DMR stimulus and STRF analysis

234 The DMR stimulus is a continuous time-varying broadband noise stimulus that covers the frequency range  
235 between 0.1 and 35 kHz (5-min duration; 65 dB spectrum level per  $\frac{1}{3}$  octave; 96-kHz sampling rate; 24-bit  
236 resolution) (Escabí and Schreiner, 2002; Miller et al., 2002). At any instant of time, the stimulus had a  
237 sinusoidal spectrum; the spectral modulation frequency (0-4 cycles/octave) determined the density of the  
238 spectral peaks. The peak-to-peak amplitude of the ripple was 30 dB. The temporal modulation frequency  
239 (0-50 Hz) controlled the stimulus' temporal modulations. Both the spectral and temporal parameters  
240 varied randomly and dynamically; the maximum rates of change for these parameters were 0.25 Hz and  
241 1.2 Hz, respectively.

242 From the multiunit spiking activity, we derived each site's STRF by averaging the spectrotemporal  
243 envelope of the DMR relative to time of each spike recorded at each electrode channel. We considered  
244 the frequency value corresponding to the STRF peak as the BF of the electrode channel.

245

### 246 *Behavioral-data analysis*

247 In each recording session, we calculated the hit, miss, and false-alarm rates. Behavioral  $d'$  was defined as  
248 the difference between the z-transform of the hit and false-alarm rates. We calculated  $d'$  as a function of  
249 the frequency separation between the tone-burst sequences.

250

### 251 *Neural-data analysis*

252 Our neural-data analyses focused on the time-varying MUA to facilitate comparison between our findings  
253 and those of previous studies that examined MUA correlates of auditory streaming (Fishman et al., 2001a,

Banno et al., 2022

254 2004, 2017). MUA and single-unit techniques have been shown to yield similar response properties,  
255 whereas MUA is more stable than single-unit activity (Nelken et al., 1994; Supèr and Roelfsema, 2005;  
256 Stark and Abeles, 2007).

#### 257 Extraction of MUA envelope and identification of stimulus-evoked MUA

258 For each trial and for each electrode channel, we extracted the envelope of the MUA by first bandpass  
259 (passband: 0.5-3.0 kHz) filtering the neural signal, full-wave rectifying the filtered signal, and then low-  
260 pass (0.6-kHz cutoff frequency) filtering it (Legatt et al., 1980; Steinschneider et al., 1992; Fishman et al.,  
261 2001a; Supèr and Roelfsema, 2005; Fishman and Steinschneider, 2006). We then averaged together these  
262 trial-by-trial MUA envelopes as a function of the frequency separation between the low- and high-  
263 frequency tone bursts and behavioral choice (hits versus misses) and electrode channel. Next, we summed  
264 the averaged MUA envelope over a 75-ms window that included each tone burst's 50-ms duration and  
265 the 25-ms silent gap that followed the offset of each tone burst. This procedure reduced the time-varying  
266 averaged MUA envelope to a single value for each tone burst in the low- and high-frequency tone-burst  
267 sequences.

268 Finally, we z-scored these MUA values relative to an analogous distribution of "baseline" values. This  
269 distribution was generated from a random sampling of 75-ms windows during the -1000 ms to -500 ms  
270 period that preceded the onset of a tone-burst sequence. If at least one of these z-scored MUA (zMUA)  
271 values from the first L-H-H triplet was  $>1.96$  (95% confidence level of z-score value), we considered the  
272 zMUA for the channel to be "stimulus evoked". We only report data from recordings with such "stimulus-  
273 evoked" zMUAs.

274

Banno et al., 2022

275 Quantification of stimulus- and task-related neural correlates of auditory streaming

276 We calculated three indices to test how zMUA was modulated by the frequency values of the low- and  
277 high-frequency tone bursts and by the monkeys' choices. These indices were calculated as a function of  
278 tone-burst position in a trial and for each electrode channel.

279 The first index, the “context” index (CI), quantified how zMUA was modulated by a low-frequency  
280 tone burst during (1) trials in which the value of the low-frequency tone burst was close to the high-  
281 frequency value (i.e., a small  $\Delta F$ ) versus (2) those trials in which the value of the low-frequency tone burst  
282 was much lower than the high-frequency value (i.e., a large  $\Delta F$ ). As a reminder, the frequency of the low-  
283 frequency tone bursts was held constant across trials, whereas the high-frequency value changed trial-  
284 by-trial. Thus, the CI quantified how zMUA elicited by the same low-frequency tone bursts was modulated  
285 by different values of the interleaved high-frequency tone bursts. The index was calculated as follows:

286 
$$CI = \text{abs}(z\text{MUA}^L_{\text{sdF, hit}} - z\text{MUA}^L_{\text{ldF, hit}}) + \text{abs}(z\text{MUA}^L_{\text{sdF, miss}} - z\text{MUA}^L_{\text{ldF, miss}}).$$

287 The superscript L indicates that the zMUA was elicited by a low-frequency tone burst. The subscripts  
288 sdF, ldF, hit, and miss indicate the zMUA that was calculated from smallest  $\Delta F$  trials, from largest  $\Delta F$   
289 trials, on hit trials, and on miss trials, respectively. We then log-transformed each value to normalize the  
290 skewed distribution. Large negative CI values would indicate that the zMUA elicited by the low-frequency  
291 tone bursts was relatively invariant to the frequency value of the high-frequency tone bursts. Positive CI  
292 values would indicate that the zMUA elicited by the low-frequency tone bursts was modulated by the  
293 frequency value of the high-frequency tone bursts. The smallest and largest  $\Delta F$  values varied across  
294 recording sessions (typically 1-8 semitones for monkey D and 4-24 semitones for monkey C).

295 The second index, the “frequency selectivity” index (FSI), is a more typical assessment of frequency  
296 selectivity. The FSI quantified how zMUA was modulated by the smallest and largest frequency values of  
297 the high-frequency tone bursts. So, unlike the CI index, the FSI compared zMUA selectivity for different  
298 frequency values. The index was calculated as follows:

Banno et al., 2022

299 
$$\text{FSI} = \text{abs}(z\text{MUA}^{\text{H}}_{\text{sdF,hit}} - z\text{MUA}^{\text{H}}_{\text{ldF,hit}}) + \text{abs}(z\text{MUA}^{\text{H}}_{\text{sdF,miss}} - z\text{MUA}^{\text{H}}_{\text{ldF,miss}}).$$

300 The superscript H indicates that the zMUA was elicited by a high-frequency tone burst. The subscripts  
301 sdF, ldF, hit, and miss indicate the zMUA that was calculated from smallest  $\Delta F$  trials, from largest  $\Delta F$   
302 trials, on hit trials, and on miss trials, respectively. We took the absolute values to eliminate the best-  
303 frequency-dependent response difference in FSI. The FSI was then log-transformed each value to  
304 normalize the skewed distribution. Large negative FSI values would indicate that the zMUA was not  
305 frequency selective, whereas larger positive values would indicate greater frequency selectivity.

306 Finally, to assess the sensitivity of MUA to the behavioral outcome of the trial (i.e., choice), we  
307 calculated a “behavioral modulation” index (BMI) in which we compared zMUA selectivity on hit and miss  
308 trials with identical  $\Delta F$  values:

309 
$$\text{BMI} = (z\text{MUA}_{\text{sdF,hit}} - z\text{MUA}_{\text{sdF,miss}}) + (z\text{MUA}_{\text{ldF,hit}} - z\text{MUA}_{\text{ldF,miss}}).$$

310 The subscripts are the same as those described above. The BMI values were calculated from zMUA elicited  
311 by both low-frequency and high-frequency tone bursts. A BMI value of 0 would indicate that the zMUA  
312 was not modulated by choice, whereas higher values would indicate the MUA responses were higher on  
313 hit trials than on miss trials.

314 In a second analogous set of analyses, instead of calculating the mean zMUA for each tone burst, we  
315 calculated the mean zMUA either over a (225-ms) L-H-H tone-burst triplet or a (150-ms) H-H tone-burst  
316 doublet. From these values, we calculated BMI and FSI values, respectively, in order to examine the  
317 laminar distribution of response modulations associated with these stimulus- and choice-related  
318 variables.

319

### 320 Statistical analyses of CI, FSI and BMI

321 We used non-parametric statistics and post-hoc comparisons to evaluate null hypotheses. In all statistical  
322 tests, we rejected the null hypothesis at  $p < 0.05$ , false-discovery rate corrected.

Banno et al., 2022

## 323 **Results**

324 While two rhesus macaques (monkey D and monkey C) performed a behavioral task designed to provide  
325 an objective measure of auditory streaming (Sussman and Steinschneider, 2009), we recorded laminar  
326 profiles of multiunit activity (MUA) and local field potentials (LFPs) in the core and belt regions of the  
327 auditory cortex. We collected neural and behavioral data in 38 different recording sessions (16 sessions  
328 from monkey D and 22 sessions from monkey C). We report data from the 381 (140 from the core and  
329 241 from the belt) recording sites that had “stimulus-evoked” MUA. We considered MUA to be “stimulus  
330 evoked” if there was a significant increase in MUA after the onset of the tone-burst sequence in the  
331 streaming task, relative to a “baseline” period that occurred prior to sequence onset; see **Materials and**

## 332 **Methods.**

333

334 *Target detection improved as the frequency separation ( $\Delta F$ ) between the two tone-burst sequences*  
335 *increased*

336 During the streaming task, monkeys detected a “deviantly” loud auditory target. This target stimulus was  
337 embedded in a temporal sequence of low-frequency tone bursts (L) that was interleaved with a sequence  
338 of high-frequency (H) tone bursts as a repeating L-H-H triplet (Fig. 1a). The sound levels of the low-  
339 frequency tone bursts were the same except for the target, which had a higher sound level than the other  
340 low-frequency tone bursts. In contrast, the sound level of the high-frequency tone bursts was variable  
341 and had sound levels above and below those in the low-frequency tone-burst sequence.

342 Figure 1b-e plots the monkeys’ hit rate and behavioral sensitivity ( $d'$ ). We found that both hit rate  
343 and  $d'$  increased as we increased the frequency separation ( $\Delta F$ ) between the tone-burst sequences (Fig.  
344 1b;  $\chi^2(4) = 27.53$ ,  $p = 1.56 \times 10^{-5}$ , Fig. 1c;  $\chi^2(4) = 27.15$ ,  $p = 1.86 \times 10^{-5}$ , Kruskal-Wallis test,  $H_0$ : medians are  
345 the same across all  $\Delta F$ s; Fig. 1d;  $Z = -4.97$ ,  $p = 6.80 \times 10^{-7}$ , Fig. 1e;  $Z = -4.79$ ,  $p = 1.64 \times 10^{-6}$ , two-tailed  
346 Wilcoxon signed-rank test,  $H_0$ : medians are the same for the smallest and the largest  $\Delta F$ s). These

Banno et al., 2022

347 behavioral results are consistent with the hypothesis that, like human listeners (Sussman and  
348 Steinschneider, 2009), target detection is more reliable when the low-frequency tone-burst sequence  
349 (which contained the target stimulus) is perceptually segregated from the high-frequency tone-burst  
350 sequence, which occurs at larger values of  $\Delta F$ .

351

352 *Core and belt auditory cortex are differentiated by their current source density (CSD) profiles and*  
353 *spectrotemporal receptive fields (STRFs)*

354 We used both CSD profiles and STRFs to differentiate between the core and belt regions of auditory  
355 cortex; to date, functional means to differentiate between these cortical regions have not been fully  
356 characterized. Whereas CSD profiles in the core auditory cortex have been extensively characterized (e.g.,  
357 Steinschneider et al., 1992; Fishman et al., 2001b; Lakatos et al., 2005; Szymanski et al., 2009; Fishman  
358 and Steinschneider, 2010), less is known regarding the laminar distribution of current flow in non-primary  
359 auditory cortex (Fu et al., 2004; Kajikawa et al., 2015), especially in non-human primate models. Similarly,  
360 STRFs in the core and belt auditory cortex have not been well characterized in non-human primates.

361         Using standard analytical techniques, we derived the one-dimensional CSD profiles from the LFPs  
362 to compare the laminar distribution of net transmembrane extracellular current flow associated with  
363 synaptic activity of neural ensembles in the core and belt auditory cortex (Fig. 2a-f) (Freeman and  
364 Nicholson, 1975; Nicholson and Freeman, 1975; Müller-Preuss and Mitzdorf, 1984; Mitzdorf, 1985;  
365 Steinschneider et al., 1992). In the core region, the CSD profile displayed a characteristic dipole pattern  
366 indicating net current influx (a putative current sink) and efflux (a putative current source) (Fig. 2b). In the  
367 middle channels of the electrode array, the CSD showed a sharp negative deflection (current sink) soon  
368 after stimulus onset (indicated by an arrow in Fig. 2b). In the same channel, we also observed large  
369 increases in MUA (Fig. 2c). This large initial current sink, which typically coincides with the largest increases  
370 in MUA, is a characteristic feature of stimulus-evoked laminar response profiles in the core auditory cortex



Banno et al., 2022

371 (Steinschneider et al., 1992; Fishman et al., 2001b; Lakatos et al., 2005; Fishman and Steinschneider, 2010)  
372 and is consistent with post-synaptic depolarization of neural populations within putative input (granular)  
373 layers of the core auditory cortex (lamina 4 and lower lamina 3).

374 We found a somewhat different CSD profile in belt auditory cortex (Fig. 2d-f). The CSD profile  
375 again showed dipoles evoked by the noise bursts, and we could identify a clear negative deflection  
376 immediately after stimulus onset (indicated by the arrow in a middle channel of the electrode array; Fig.  
377 2e). As in core, we observed increases in MUA in the same electrode channel as the initial current sink  
378 (Fig. 2f). We operationally defined the channel exhibiting the initial current sink with a concomitant  
379 increase in MUA as the input layer of the belt region of the auditory cortex. However, unlike the core, the  
380 adjacent channels displayed comparatively weak MUA responses. Further, the current sources and sinks  
381 were overall less sharp and temporally less precise in the belt auditory cortex than in the core auditory  
382 cortex (Fig. 2e, f).

383 These differences between the core and belt CSD profiles became clearer when we calculated the  
384 average rectified CSD (AVREC; Mehta et al., 2000a, 2000b; Fishman and Steinschneider, 2012). Because  
385 the AVREC represents the average (absolute) net extracellular current flow across cortical layers, it is  
386 useful tool to identify gross differences in the temporal dynamics of current flow between cortical areas.  
387 Figure 2k plots the AVREC for these two core and belt sites. As can be seen, the AVREC in the core auditory  
388 cortex has a shorter peak latency, sharper onset, and overall larger amplitude than the AVREC in the belt  
389 auditory cortex.

390 In addition to differences in their CSD profiles, we found differences between the STRFs in the  
391 core and belt (Fig. 2g-j). As reported in other studies (Miller et al., 2002; Atencio and Schreiner, 2010),  
392 core STRFs had short latencies (typically <20 ms) with small circumscribed excitatory and inhibitory  
393 response fields (Fig. 2g, h). Further, the variability of BF across electrode penetrations was larger than

Banno et al., 2022

394 within electrode penetrations ( $F(9,166) = 7.17$ ,  $p = 9.37 \times 10^{-9}$ ; one-way ANOVA), suggesting that BF is  
395 relatively constant across cortical laminae (Atencio and Schreiner, 2010).

396 Belt STRFs, like core STRFs, also had clearly structured excitatory and inhibitory response fields  
397 (Fig. 2i, j). Belt STRFs, however, tended to have longer response latencies (26.7 ms and 48.3 ms in the  
398 example STRFs, Fig. 2i and 2j, respectively) than core STRFs (16.5 ms and 15.2 ms in the example STRFs,  
399 Fig. 2g, and 2h, respectively). Indeed, across our population, the core STRF latency ( $37.8 \pm 21.4$  ms, median  
400  $\pm$  median absolute deviation) was significantly shorter than the belt STRF latency ( $42.9 \pm 17.9$  ms) ( $Z = -$   
401  $2.32$ ,  $p = 0.02$ ; Wilcoxon rank-sum test;  $H_0$ : median latency is the same in the core and belt). Qualitatively,  
402 belt excitatory and inhibitory fields tended to be less circumscribed (i.e., they had broader spectral or  
403 longer temporal profiles). But, like the core auditory cortex, our estimates of BF were relatively constant  
404 across lamina (BF = 208 Hz and 169 Hz, respectively for the STRFs shown in Fig. 2i and 2j). As in the core,  
405 the variability of BF across electrode penetrations was larger than within an electrode penetrations  
406 ( $F(19,197) = 6.81$ ,  $p = 1.23 \times 10^{-13}$ ; one-way ANOVA).

407

#### 408 *MUA encoded a mixture of stimulus and task variables*

409 In both the core and belt regions of auditory cortex, MUA in both the core and belt regions of auditory  
410 cortex was modulated by both the stimulus and task variables of the streaming task. A MUA profile from  
411 an example site in the core auditory cortex is shown in Figure 3a. In this example, MUA was discretely  
412 phase-locked to each tone burst in the L-H-H sequence. When  $\Delta F$  was small (i.e., the frequency value of  
413 the high-frequency tone bursts was near that of the low-frequency tone bursts, which was set to a site's  
414 BF), both the low- and high-frequency tone bursts elicited strong bursts of MUA. However, as  $\Delta F$   
415 increased, the high-frequency tone bursts elicited lower amplitudes of MUA, whereas the MUA elicited  
416 by the low-frequency tone bursts (which were set to the site's BF) remained relatively unaffected (Fig. 3a,  
417 top). This stimulus-related modulation is further highlighted when we calculated the difference in MUA

Banno et al., 2022

418 amplitude between the small and large  $\Delta F$  conditions (8 and 24 semitones, respectively; Fig. 3a, bottom).  
419 The MUA at this example site was not differentially modulated by the (louder) deviant target (Fig. 3a, top,  
420 right) nor was it modulated by the monkey's behavioral choice (hits versus misses; Fig. 3a, right, middle  
421 and bottom).

422 Figure 3b shows a MUA profile from an example site in the belt auditory cortex. Like the example  
423 profile from the core, the MUA was phase-locked responses to each tone of the L-H-H sequence and for  
424 both small and large values of  $\Delta F$  (1 and 8 semitones, respectively; Fig. 3b, top). However, these responses  
425 were temporally less precise than those seen in the core (Fig. 3a). Furthermore, unlike responses in the  
426 core, as  $\Delta F$  increased, the amplitude of MUA elicited by the low-frequency tone bursts tended to increase  
427 (Fig. 3b, bottom). Finally, the target tone burst elicited greater MUA than the non-target tone bursts (Fig.  
428 3b, right). However, the MUA was not appreciably modulated by the monkey's behavioral choices (hits vs  
429 misses; Fig. 3b, right, middle and bottom).

430 Figure 3c shows a second MUA profile from the core auditory cortex. Like the examples in Fig. 3a  
431 and 3b, the MUA was phase-locked response to the low-frequency tone burst, which became more  
432 distinct in large  $\Delta F$  trials (Fig. 3c; top). In addition, we found that the MUA was modulated by the monkey's  
433 choices: the MUA response was higher on hit trials than on miss trials (Fig. 3c: middle and bottom).

434

435 *Stimulus- and task-related variables of the auditory streaming task are differentially and dynamically*  
436 *encoded in core and belt auditory cortex*

437 To quantify the stimulus- and task-related variables encoded in the MUA, we calculated three different  
438 indices (see **Materials and Methods**). We calculated each index for each tone burst in a triplet (i.e., the  
439 low-frequency tone burst [L] and the two high-frequency tone bursts [H1 and H2]) and as a function of  
440 time (relative to stimulus onset and target onset). For each of these index values, we collapsed the values  
441 across electrode channels to form distributions as a function of time and brain region (core and belt).

Banno et al., 2022

442           The first index, the context index (CI), quantified whether neural responses to the (frequency-  
443 fixed) low-frequency tone bursts were modulated by the different values of the high-frequency tone  
444 bursts. Large negative CI values would indicate that the zMUA elicited by the low-frequency tone bursts  
445 was relatively invariant to the frequency value of the high-frequency tone bursts. Positive CI values would  
446 indicate that the zMUA elicited by the low-frequency tone bursts was modulated by the frequency value  
447 of the high-frequency tone bursts. The results of this analysis are shown in Figure 4a (left). As can be seen,  
448 core and belt CI values at the beginning of the tone-burst sequence were relatively small (CI at the first  
449 triplet position;  $-0.22 \pm 0.10$  in the core and  $0.21 \pm 0.06$  in the belt, mean  $\pm$  standard error). However, as  
450 the sequence unfolded, the CI increased sharply and remained relatively constant through target  
451 presentation (core:  $\chi^2(4) = 156.1$ ,  $p < 1.0 \times 10^{-10}$ ; belt:  $\chi^2(4) = 112.9$ ,  $p < 1.0 \times 10^{-10}$ ; Kruskal-Wallis test,  $H_0$ :  
452 CI medians are the same across triplet positions). The CI values were consistently larger in the core  
453 auditory cortex than in the belt ( $\chi^2(1) = 11.57$ ,  $p = 6.70 \times 10^{-4}$ ; Friedman test,  $H_0$ : CI medians are the same  
454 in the core and belt).

455           The second index, the frequency-selectivity index (FSI), quantified the degree to which the MUA  
456 elicited by the high-frequency tone bursts was modulated by their different frequency values. The FSI is  
457 akin to a traditional measure of frequency selectivity. Large negative FSI values would indicate that the  
458 zMUA was not frequency selective, whereas larger positive values would indicate greater frequency  
459 selectivity. For both the first and second high-frequency tone bursts in the L-H-H triplet (H1 and H2,  
460 respectively), FSI values were generally largest for the first triplet and got smaller over time (Fig. 4a, middle  
461 and right; core<sub>H1</sub>:  $\chi^2(4) = 5.45$ ,  $p = 0.24$ ; core<sub>H2</sub>:  $\chi^2(4) = 12.56$ ,  $p = 0.01$ ; belt<sub>H1</sub>:  $\chi^2(4) = 10.01$ ,  $p = 0.04$ ; and  
462 belt<sub>H2</sub>:  $\chi^2(4) = 10.30$ ,  $p = 0.04$ ; Kruskal-Wallis test,  $H_0$ : FSI medians are the same across triplet positions).  
463 In other words, in both the core and belt, MUA frequency selectivity became poorer as the tone-burst  
464 sequence unfolded. Although both core and belt MUA had similar temporal dynamics, core FSI values

Banno et al., 2022

465 were consistently larger than those in belt across all time periods (Fig. 4a; H1:  $\chi^2(1) = 43.97$ ,  $p < 1.0 \times 10^{-10}$ ;  
466  $10$ ; and H2:  $\chi^2(1) = 53.92$ ,  $p < 1.0 \times 10^{-10}$ , Friedman test, H<sub>0</sub>: FSI medians are the same in the core and belt).

467 Finally, the behavioral-modulation index (BMI) quantified the degree to which MUA elicited by  
468 the tone-burst sequence was modulated by the monkeys' behavioral choices (hits vs misses). A BMI value  
469 of 0 would indicate that MUA was not modulated by choice, whereas larger values would indicate  
470 increased sensitivity to choice. BMI significantly increased as the tone-burst sequence unfolded over time  
471 for all three tone bursts in the triplet both in the core (L:  $\chi^2(4) = 52.27$ ,  $p = 1.21 \times 10^{-10}$ ; H1:  $\chi^2(4) = 101.0$ ,  
472  $p < 1.0 \times 10^{-10}$ ; H2:  $\chi^2(4) = 113.3$ ,  $p < 1.0 \times 10^{-10}$ ; Kruskal-Wallis test, H<sub>0</sub>: BMI medians are the same across  
473 triplet positions) and in the belt (L:  $\chi^2(4) = 53.17$ ,  $p < 1.00 \times 10^{-10}$ ; H1:  $\chi^2(4) = 159.4$ ,  $p < 1.0 \times 10^{-10}$ ; and H2:  
474  $\chi^2(4) = 166.0$ ,  $p < 1.0 \times 10^{-10}$ ; Kruskal-Wallis test, H<sub>0</sub>: BMI medians are the same across triplet positions).  
475 Core BMI values tended to be larger than belt BMI values (L:  $\chi^2(1) = 23.45$ ,  $p = 1.28 \times 10^{-6}$ ; H1:  $\chi^2(1) = 3.23$ ,  
476  $p = 0.072$ ; H2:  $\chi^2(1) = 35.37$ ,  $p = 2.72 \times 10^{-9}$ , Friedman test, H<sub>0</sub>: BMI medians are the same in the core and  
477 belt).

478 To further investigate this build-up of BMI values over time, we realigned the BMI values relative  
479 to target onset (Fig. 5a). We found that BMI values tended to increase monotonically over time,  
480 independent of the frequency value of the tone bursts and whether they were a target (core:  $\chi^2(11) =$   
481  $167.3$ ,  $p < 1.0 \times 10^{-10}$ ; belt:  $\chi^2(11) = 328.7$ ,  $p < 1.0 \times 10^{-10}$ ; Kruskal-Wallis test, H<sub>0</sub>: BMI medians are the same  
482 across time). This contrasts with CI and FSI values (Fig. 5b): relative to target onset, CI and FSI values did  
483 not change reliably over time (core CI:  $\chi^2(3) = 0.53$ ,  $p = 0.91$ ; belt CI:  $\chi^2(3) = 2.15$ ,  $p = 0.54$ ; core FSI<sub>H1</sub>:  $\chi^2(3)$   
484  $= 1.45$ ,  $p = 0.69$ ; belt FSI<sub>H1</sub>:  $\chi^2(3) = 0.13$ ,  $p = 0.99$ ; core FSI<sub>H2</sub>:  $\chi^2(3) = 0.82$ ,  $p = 0.85$ ; belt FSI<sub>H2</sub>:  $\chi^2(3) = 0.75$ ,  $p$   
485  $= 0.86$ ; Kruskal-Wallis test, H<sub>0</sub>: CI and FSI medians are the same across triplet positions).

486 This monotonic increase in BMI was further highlighted when we collapsed MUA across the L-H-  
487 H triplet and replotted the BMI temporal profile (Fig. 5c; core:  $\chi^2(3) = 69.71$ ,  $p < 1.0 \times 10^{-10}$ ; belt:  $\chi^2(3) =$   
488  $140.1$ ,  $p < 1.0 \times 10^{-10}$ ; Kruskal-Wallis test, H<sub>0</sub>: BMI medians are the same across triplet positions). Even

Banno et al., 2022

489 when we limited this analysis to the triplet containing the target and examined BMI values only for those  
490 target triplets that appeared “early” in a tone-burst sequence (i.e., the target that appeared at the earliest  
491 triplet position in the recording session; typically 4<sup>th</sup> and 7<sup>th</sup> triplet for monkey D and monkey C,  
492 respectively) versus those that appeared “late” (i.e., the target that appeared at the latest triplet position  
493 in the session; typically 7<sup>th</sup> and 10<sup>th</sup> triplet in monkey D and monkey C, respectively), we found that BMI  
494 values significantly increased when target onset occurred later in a sequence (Fig. 5d; core:  $\chi^2(3) = 14.88$ ,  
495  $p = 0.0019$ ; belt:  $\chi^2(3) = 8.01$ ,  $p = 0.046$ , Kruskal-Wallis test,  $H_0$ : BMI medians are the same across target  
496 positions). Finally, these analyses are consistent with our previous finding (see Fig. 4b) that BMI values  
497 were significantly higher in the core auditory cortex than in the belt (Fig. 5c:  $\chi^2(1) = 36.64$ ,  $p = 1.42 \times 10^{-9}$ ;  
498 Fig. 5d:  $\chi^2(1) = 15.01$ ,  $p = 1.07 \times 10^{-4}$ , Friedman test,  $H_0$ : BMI medians are the same for core and belt).

499

#### 500 *Laminar specificity of neural correlates of streaming in core and belt auditory cortex*

501 We reanalyzed our three indices as a function of laminar depth (i.e., supragranular, granular, and  
502 infragranular layers), which was operationally identified based on each penetration’s CSD profile (Fig. 2),  
503 in order to identify the laminar distribution of stimulus- and choice-related modulations of MUA elicited  
504 during the streaming task. For our analysis of the laminar distribution of the CI and FSI, we focused on  
505 MUA that was elicited by the triplet immediately preceding target onset (i.e., the T-1 triplet position in  
506 Fig. 4 and 5) to minimize the possibility that changes in activity were due to an increase in the sound level  
507 of the target tone burst. For the BMI, we focused on MUA that was elicited by the triplet containing the  
508 target (T triplet position in Fig. 4 and 5).

509 We found a non-uniform distribution of stimulus- and choice-related representations across  
510 different cortical layers (Fig. 6a). A Scheirer-Ray-Hare test (non-parametric two-way [brain region x layer]  
511 ANOVA) indicated a significant main effect across layers for all indices (FSI:  $H(2) = 18.55$ ,  $p = 9.39 \times 10^{-5}$ ;  
512 CI:  $H(2) = 13.83$ ,  $p = 9.93 \times 10^{-4}$ ; and BMI:  $H(2) = 8.52$ ,  $p = 0.014$ ;  $H_0$ : median index values are the same

Banno et al., 2022

513 across layers). However, post-hoc analyses did not reveal differences in the index distributions across the  
514 layers of the core auditory cortex ( $p > 0.05$ ; Dunn test). In contrast, we found laminar differences in the  
515 distribution of index values in the belt auditory cortex: median FSI and CI values were both lower in the  
516 infragranular layers than in the supragranular or granular layers, whereas the median BMI value was  
517 higher in the infragranular layers than in the granular layer (Fig. 6a;  $p < 0.05$ , Dunn test).

518         Because these indices are not bounded, comparisons based on their absolute values may fail to  
519 reveal, or even exaggerate, laminar differences. To address this issue, we z-scored each index and  
520 performed pairwise comparisons of the z-scored indices in each layer of each cortical area. Once again,  
521 we did not find significant differences for any comparisons in the core auditory cortex (Fig. 6b;  $p > 0.05$ ,  
522 Wilcoxon signed-rank test with Bonferroni correction,  $H_0$ : median difference is different from zero). In  
523 contrast, in the belt auditory cortex, we found that MUA was modulated more by stimulus-related  
524 variables (FSI and CI) than by choice (BMI) in the granular layer. In contrast, MUA was modulated more by  
525 choice than by stimulus-related variables in the infragranular layer (Fig. 6b;  $p < 0.05$ , Wilcoxon signed-  
526 rank test with Bonferroni correction).

Banno et al., 2022

## 527 **Discussion**

528 In this study, we examined how MUA in the core and belt regions of auditory cortex of rhesus monkeys  
529 was modulated during a behavioral task that provided an objective measure of auditory streaming. We  
530 found that MUA was modulated by both stimulus- and choice-related variables. Further, we identified  
531 two key differences between these variables' representations in the core and belt auditory cortex. First,  
532 on average, stimulus- and choice-related MUA modulations were higher in the core than in the belt.  
533 Second, whereas these two variables were uniformly distributed across cortical layers in core, we found  
534 a layer-dependent representation of these variables in belt, with stimulus- and choice-related  
535 modulations predominating in superficial and deep cortical layers, respectively.

536

### 537 *Streaming behavior in monkeys is comparable to humans*

538 In our previous study of auditory streaming, we trained monkeys to report whether two interleaved  
539 sequences of tone bursts were heard as “one stream” or “two streams” (Christison-Lagay and Cohen,  
540 2014, 2018). As expected from previous work on streaming (van Noorden, 1975; Bregman, 1990; Moore  
541 and Gockel, 2002; Carlyon, 2004; Sussman and Steinschneider, 2009), the proportion of the monkeys'  
542 reports of “two streams” increased as we increased the frequency separation between the two tone-burst  
543 sequences. However, an alternative interpretation is that the monkeys were not reporting their streaming  
544 percept per se but rather their categorical judgement of whether the tone-burst sequences had a large or  
545 small frequency separation.

546 Here, we modified the task design so that instead of reports of “one stream” or “two streams”,  
547 the monkeys reported a deviantly loud target stimulus (Fig. 1). This task change was critical because it  
548 enabled a disassociation of the stimulus dimension that the monkeys needed to detect (sound level) from  
549 the dimension that affected streaming (i.e., the frequency separation  $[\Delta F]$  of the tone-burst sequences).  
550 In other words, it was the hypothesized segregation of the tone-burst sequences that facilitated target



Banno et al., 2022

551 detection, but  $\Delta F$  only indirectly affected behavioral performance. Indeed, Sussman and Steinschneider  
552 (2009) study, which was conducted in human participants, demonstrated a high correlation between  
553 target detection and the participants' subjective reports of stream segregation. Similarly, our monkeys  
554 showed a monotonic improvement in performance as we increased the  $\Delta F$  between the tone-burst  
555 sequences (Fig. 1). Together with previous reports (Izumi, 2002; Selezneva et al., 2012; Christison-Lagay  
556 and Cohen, 2014), our results add further evidence that non-human primates process auditory streams in  
557 a manner like human listeners.

558         Although qualitatively similar to those in human subjects (Sussman and Steinschneider, 2009), the  
559 monkeys' overall hit rates and  $d'$  values were lower. These behavioral differences may be attributed, in  
560 part, to differences in task design. For example, in the human study, the stimulus sequence was presented  
561 for several minutes, whereas our stimulus duration was considerably shorter (<2 s). Because stream  
562 segregation "builds up" over time (Bregman, 1978; Carlyon et al., 2001), the longer-duration listening time  
563 might have given the human listeners a behavioral advantage. Moreover, during those long stimulus  
564 durations, in the Sussman and Steinschneider study (2009),  $\Delta F$  was held constant with multiple  
565 presentations of the same deviant target, whereas, in our task,  $\Delta F$  varied trial-by-trial with only one target  
566 presentation per trial.

567

#### 568 *Frequency-dependent modulation of MUA during the streaming task*

569 MUA was modulated by the frequency values of the tone-burst sequence (Figs. 3 and 4). For example, we  
570 found that MUA sensitivity to differences in the values of the high-frequency tone-burst sequence  
571 decreased over time (Fig. 4a). This finding suggests that MUA frequency selectivity to task irrelevant high-  
572 frequency tone bursts became poorer as a task trial unfolded. This change in frequency selectivity is  
573 consistent with some form of time-sensitive habituation or suppression. In studies in which streaming was  
574 examined in passively listening monkeys, such time-dependent habituation or suppression has been

Banno et al., 2022

575 reported as a key neural correlate of auditory streaming in the primary auditory cortex, especially  
576 (Fishman et al., 2001a, 2004; Micheyl et al., 2005).

577           However, our observation that the CI values increased over time (Figs. 3 and 4a) does not readily  
578 fit into such a habituation/suppression scheme. Instead, we hypothesize that the dynamics of MUA  
579 sensitivity to the low- and high-frequency values of the tone-burst sequence reflect some form of  
580 spectrotemporal filter that was engaged when the monkeys were actively participating in our streaming  
581 task. Indeed, Lakatos et al. (2013) reported that attention recruits cortical oscillations that can enhance  
582 neural responsivity when monkeys are asked to attend to tone bursts in a sequence. Because this filter  
583 mechanism is frequency dependent, it could enhance activity in response to tone bursts set to a site's BF  
584 (i.e., the low-frequency tone bursts), while simultaneously suppressing responses elicited by non-BF tone  
585 bursts (i.e., the high-frequency tone bursts) (Lakatos et al., 2013; O'Connell et al., 2014). Because of these  
586 opposing computations, as the tone-burst sequence unfolded, neural populations sensitive to the  
587 frequency values of the BF and non-BF tone bursts would become differentially active and thereby provide  
588 a means for downstream neurons to readout information about the number of auditory streams in the  
589 environment (Fishman et al., 2001a, 2004, 2017). That is, when BF and non-BF neural populations have  
590 comparable overlapping levels of activity, downstream neurons could read-out the stimulus as "one  
591 stream" but when they have different, non-overlapping activity levels, the read-out would be "two  
592 streams". It is worth noting that we cannot comment on whether the present data and this interpretation  
593 also support the temporal-coherence model of auditory streaming (Elhilali et al., 2009; Shamma et al.,  
594 2011; Rezaeizadeh and Shamma, 2021); this could only be determined if we had presented the tone bursts  
595 in the sequences simultaneously and not interleaved as in the present study.

596

Banno et al., 2022

597 *Choice-related modulations in core and belt auditory cortex*

598 MUA in the core and belt auditory cortex was modulated by the monkeys' behavioral choices (i.e., hits  
599 versus misses; Figs. 4b and 5). These choice-related modulations were observed in response to both the  
600 low-frequency and high-frequency tone bursts. We also found that, as a trial unfolded, choice-related  
601 modulations increased, even when we controlled for target tone bursts that occurred "early" in the  
602 sequence versus those that occurred "later" (Fig. 5d). This buildup of choice-related activity was also seen  
603 in our previous streaming study (Christison-Lagay and Cohen, 2018).

604 Choice-related activity has been reported previously in studies that related behavior to neural  
605 activity in the core auditory cortex (Niwa et al., 2012a, 2012b, 2013; Bizley et al., 2013). However, whereas  
606 belt activity has been shown to be causally related to an ongoing decision (Tsunada et al., 2016), it is not  
607 clear whether core activity is also part of a feedforward process that underlies the ongoing decision.  
608 Indeed, our observation that choice-related activity was greater in core than in belt does not fit well into  
609 a 'hierarchical' model in which early cortical areas represent sensory attributes of stimulus and later areas  
610 convert these representations into a behavioral decision (Gold and Shadlen, 2007; Tsunada et al., 2016).  
611 Further, the fact that the choice-related activity was seen prior to the onset of the target and was  
612 modulated by the time of target onset within a sequence (Figs. 4 and 5) suggests that a more parsimonious  
613 explanation: namely, choice-related activity reflects some form of attention or expectation. Indeed, target  
614 anticipation can dynamically recruit top-down attentional processes that modulate neural activity (Ghose  
615 and Maunsell, 2002; Nienborg and Cumming, 2009). Further work that compares the time of the actual  
616 perceptual decision with changes in neural activity (Tsunada et al., 2016, 2019) as well as causal  
617 manipulations would be needed to understand more fully the contribution of this type of activity to  
618 behavior.

619

Banno et al., 2022

620 *Laminar organization of stimulus- and choice-related MUA*

621 We could not identify a laminar parcellation in the core auditory cortex but were able to identify such  
622 laminar differences in the belt (Fig. 6). It is possible, however, that such a distribution does exist in the  
623 core but is less robust than in the belt, and our analyses were not sensitive enough to characterize it.

624 We found more choice-related activity in deep (infragranular) layers of the belt auditory cortex,  
625 which receive feedback projections from higher-cortical areas (Galaburda and Pandya, 1983; Felleman  
626 and Van Essen, 1991; Hackett et al., 2014). These feedback projections may be the source of  
627 attentional/expectation signals discussed above. On the other hand, stimulus-related modulations were  
628 more pronounced in superficial layers of the belt, consistent with activity transmitted via feedforward  
629 projections from earlier sensory areas (Galaburda and Pandya, 1983; Felleman and Van Essen, 1991;  
630 Hackett et al., 2014). Although, the laminar distribution of spectrotemporal tuning, tonotopy, and other  
631 sensory features have been studied in other model systems (Atencio and Schreiner, 2010; Kanold et al.,  
632 2014; O'Connell et al., 2014), this is the first identification of the differential representation of task-related  
633 variables in different layers of the non-human primate auditory cortex. Overall, the concordance of these  
634 previously described anatomical projection patterns and the laminar distributions of task variables  
635 suggests a differential representation of stimulus- and choice-related variables along the ventral cortical  
636 auditory pathway during our auditory streaming task.

637

638

639 **References**

- 640 Atencio CA, Schreiner CE (2010) Columnar Connectivity and Laminar Processing in Cat Primary Auditory  
641 Cortex. *PLOS ONE* 5:e9521.
- 642 Bee MA, Klump GM (2004) Primitive Auditory Stream Segregation: A Neurophysiological Study in the  
643 Songbird Forebrain. *J Neurophysiol* 92:1088–1104.
- 644 Bizley JK, Walker KMM, Nodal FR, King AJ, Schnupp JWH (2013) Auditory Cortex Represents Both Pitch  
645 Judgments and the Corresponding Acoustic Cues. *Curr Biol* 23:620–625.
- 646 Bregman AS (1978) Auditory streaming is cumulative. *J Exp Psychol Hum Percept Perform* 4:380–387.
- 647 Bregman AS (1990) *Auditory Scene Analysis: The Perceptual Organization of Sound*. Cambridge, MA: MIT.
- 648 Brosch M, Bauer R, Eckhorn R (1997) Stimulus-dependent modulations of correlated high-frequency  
649 oscillations in cat visual cortex. *Cereb Cortex* 7:70–76.
- 650 Carlyon RP (2004) How the brain separates sounds. *Trends Cogn Sci* 8:465–471.
- 651 Carlyon RP, Cusack R, Foxtton JM, Robertson IH (2001) Effects of attention and unilateral neglect on  
652 auditory stream segregation. *J Exp Psychol Hum Percept Perform* 27:115–127.
- 653 Christison-Lagay KL, Cohen YE (2014) Behavioral correlates of auditory streaming in rhesus macaques.  
654 *Hear Res* 309:17–25.
- 655 Christison-Lagay KL, Cohen YE (2018) The Contribution of Primary Auditory Cortex to Auditory  
656 Categorization in Behaving Monkeys. *Front Neurosci* 12:601.
- 657 Cusack R (2005) The Intraparietal Sulcus and Perceptual Organization. *J Cogn Neurosci* 17:641–651.
- 658 Denham SL, Winkler I (2020) Predictive coding in auditory perception: challenges and unresolved  
659 questions. *Eur J Neurosci* 51:1151–1160.
- 660 Drucker CB, Carlson ML, Toda K, DeWind NK, Platt ML (2015) Non-invasive primate head restraint using  
661 thermoplastic masks. *J Neurosci Methods* 253:90–100.
- 662 Elhilali M, Ma L, Micheyl C, Oxenham AJ, Shamma SA (2009) Temporal Coherence in the Perceptual  
663 Organization and Cortical Representation of Auditory Scenes. *Neuron* 61:317–329.
- 664 Escabí MA, Schreiner CE (2002) Nonlinear Spectrotemporal Sound Analysis by Neurons in the Auditory  
665 Midbrain. *J Neurosci* 22:4114–4131.
- 666 Felleman DJ, Van Essen DC (1991) Distributed Hierarchical Processing in the Primate Cerebral Cortex.  
667 *Cereb Cortex* 1:1–47.
- 668 Fishman YI, Arezzo JC, Steinschneider M (2004) Auditory stream segregation in monkey auditory cortex:  
669 effects of frequency separation, presentation rate, and tone duration. *J Acoust Soc Am* 116:1656–1670.
- 670 Fishman YI, Kim M, Steinschneider M (2017) A Crucial Test of the Population Separation Model of Auditory  
671 Stream Segregation in Macaque Primary Auditory Cortex. *J Neurosci* 37:10645–10655.

Banno et al., 2022

- 672 Fishman YI, Reser DH, Arezzo JC, Steinschneider M (2001a) Neural correlates of auditory stream  
673 segregation in primary auditory cortex of the awake monkey. *Hear Res* 151:167–187.
- 674 Fishman YI, Steinschneider M (2006) Spectral Resolution of Monkey Primary Auditory Cortex (A1)  
675 Revealed With Two-Noise Masking. *J Neurophysiol* 96:1105–1115.
- 676 Fishman YI, Steinschneider M (2010) Neural Correlates of Auditory Scene Analysis Based on Inharmonicity  
677 in Monkey Primary Auditory Cortex. *J Neurosci* 30:12480–12494.
- 678 Fishman YI, Steinschneider M (2012) Searching for the Mismatch Negativity in Primary Auditory Cortex of  
679 the Awake Monkey: Deviance Detection or Stimulus Specific Adaptation? *J Neurosci* 32:15747–15758.
- 680 Fishman YI, Volkov IO, Noh MD, Garell PC, Bakken H, Arezzo JC, Howard MA, Steinschneider M (2001b)  
681 Consonance and Dissonance of Musical Chords: Neural Correlates in Auditory Cortex of Monkeys and  
682 Humans. *J Neurophysiol* 86:2761–2788.
- 683 Francis NA, Elgueda D, Englitz B, Fritz JB, Shamma SA (2018) Laminar profile of task-related plasticity in  
684 ferret primary auditory cortex. *Sci Rep* 8:16375.
- 685 Freeman JA, Nicholson C (1975) Experimental optimization of current source-density technique for anuran  
686 cerebellum. *J Neurophysiol* 38:369–382.
- 687 Frey S, Comeau R, Hynes B, Mackey S, Petrides M (2004) Frameless stereotaxy in the nonhuman primate.  
688 *NeuroImage* 23:1226–1234.
- 689 Fu K-MG, Shah AS, O’Connell MN, McGinnis T, Eckholdt H, Lakatos P, Smiley J, Schroeder CE (2004) Timing  
690 and Laminar Profile of Eye-Position Effects on Auditory Responses in Primate Auditory Cortex. *J*  
691 *Neurophysiol* 92:3522–3531.
- 692 Galaburda AM, Pandya DN (1983) The intrinsic architectonic and connectional organization of the superior  
693 temporal region of the rhesus monkey. *J Comp Neurol* 221:169–184.
- 694 Ghose GM, Maunsell JHR (2002) Attentional modulation in visual cortex depends on task timing. *Nature*  
695 419:616.
- 696 Gold JI, Shadlen MN (2007) The Neural Basis of Decision Making. *Annu Rev Neurosci* 30:535–574.
- 697 Gutschalk A, Micheyl C, Melcher JR, Rupp A, Scherg M, Oxenham AJ (2005) Neuromagnetic Correlates of  
698 Streaming in Human Auditory Cortex. *J Neurosci* 25:5382–5388.
- 699 Hackett TA, de la Mothe LA, Camalier CR, Falchier A, Lakatos P, Kajikawa Y, Schroeder CE (2014)  
700 Feedforward and feedback projections of caudal belt and parabelt areas of auditory cortex: refining the  
701 hierarchical model. *Front Neurosci* 8:72.
- 702 Izumi A (2002) Auditory stream segregation in Japanese monkeys. *Cognition* 82:B113–B122.
- 703 Kaas JH, Hackett TA (2000) Subdivisions of auditory cortex and processing streams in primates. *Proc Natl*  
704 *Acad Sci* 97:11793–11799.

Banno et al., 2022

- 705 Kajikawa Y, Frey S, Ross D, Falchier A, Hackett TA, Schroeder CE (2015) Auditory Properties in the Parabelt  
706 Regions of the Superior Temporal Gyrus in the Awake Macaque Monkey: An Initial Survey. *J Neurosci*  
707 35:4140–4150.
- 708 Kanold PO, Nelken I, Polley DB (2014) Local versus global scales of organization in auditory cortex. *Trends*  
709 *Neurosci* 37:502–510.
- 710 Lakatos P, Karmos G, Mehta AD, Ulbert I, Schroeder CE (2008) Entrainment of Neuronal Oscillations as a  
711 Mechanism of Attentional Selection. *Science* 320:110–113.
- 712 Lakatos P, Musacchia G, O’Connell MN, Falchier AY, Javitt DC, Schroeder CE (2013) The Spectrotemporal  
713 Filter Mechanism of Auditory Selective Attention. *Neuron* 77:750–761.
- 714 Lakatos P, O’Connell MN, Barczak A, Mills A, Javitt DC, Schroeder CE (2009) The Leading Sense:  
715 Supramodal Control of Neurophysiological Context by Attention. *Neuron* 64:419–430.
- 716 Lakatos P, Shah AS, Knuth KH, Ulbert I, Karmos G, Schroeder CE (2005) An Oscillatory Hierarchy Controlling  
717 Neuronal Excitability and Stimulus Processing in the Auditory Cortex. *J Neurophysiol* 94:1904–1911.
- 718 Legatt AD, Arezzo J, Vaughan HG (1980) Averaged multiple unit activity as an estimate of phasic changes  
719 in local neuronal activity: effects of volume-conducted potentials. *J Neurosci Methods* 2:203–217.
- 720 Lu K, Xu Y, Yin P, Oxenham AJ, Fritz JB, Shamma SA (2017) Temporal coherence structure rapidly shapes  
721 neuronal interactions. *Nat Commun* 8:13900.
- 722 Mehta AD, Ulbert I, Schroeder CE (2000a) Intermodal Selective Attention in Monkeys. I: Distribution and  
723 Timing of Effects across Visual Areas. *Cereb Cortex* 10:343–358.
- 724 Mehta AD, Ulbert I, Schroeder CE (2000b) Intermodal Selective Attention in Monkeys. II: Physiological  
725 Mechanisms of Modulation. *Cereb Cortex* 10:359–370.
- 726 Micheyl C, Tian B, Carlyon RP, Rauschecker JP (2005) Perceptual Organization of Tone Sequences in the  
727 Auditory Cortex of Awake Macaques. *Neuron* 48:139–148.
- 728 Miller LM, Escabi MA, Read HL, Schreiner CE (2002) Spectrotemporal Receptive Fields in the Lemniscal  
729 Auditory Thalamus and Cortex. *J Neurophysiol* 87:516–527.
- 730 Mitzdorf U (1985) Current source-density method and application in cat cerebral cortex: investigation of  
731 evoked potentials and EEG phenomena. *Physiol Rev* 65:37–100.
- 732 Moore BCJ, Gockel H (2002) Factors Influencing Sequential Stream Segregation. *Acta Acust United Acust*  
733 88:320–333.
- 734 Moore BCJ, Gockel HE (2012) Properties of auditory stream formation. *Philos Trans R Soc B Biol Sci*  
735 367:919–931.
- 736 Müller-Preuss P, Mitzdorf U (1984) Functional anatomy of the inferior colliculus and the auditory cortex:  
737 current source density analyses of click-evoked potentials. *Hear Res* 16:133–142.
- 738 Nelken I, Prut Y, Vaadia E, Abeles M (1994) Population responses to multifrequency sounds in the cat  
739 auditory cortex: One- and two-parameter families of sounds. *Hear Res* 72:206–222.

Banno et al., 2022

- 740 Nicholson C, Freeman JA (1975) Theory of current source-density analysis and determination of  
741 conductivity tensor for anuran cerebellum. *J Neurophysiol* 38:356–368.
- 742 Nienborg H, Cumming BG (2009) Decision-related activity in sensory neurons reflects more than a  
743 neuron’s causal effect. *Nature* 459:89–92.
- 744 Niwa M, Johnson JS, O’Connor KN, Sutter ML (2012a) Active Engagement Improves Primary Auditory  
745 Cortical Neurons’ Ability to Discriminate Temporal Modulation. *J Neurosci* 32:9323–9334.
- 746 Niwa M, Johnson JS, O’Connor KN, Sutter ML (2012b) Activity Related to Perceptual Judgment and Action  
747 in Primary Auditory Cortex. *J Neurosci* 32:3193–3210.
- 748 Niwa M, Johnson JS, O’Connor KN, Sutter ML (2013) Differences between Primary Auditory Cortex and  
749 Auditory Belt Related to Encoding and Choice for AM Sounds. *J Neurosci* 33:8378–8395.
- 750 O’Connell MN, Barczak A, Schroeder CE, Lakatos P (2014) Layer Specific Sharpening of Frequency Tuning  
751 by Selective Attention in Primary Auditory Cortex. *J Neurosci* 34:16496–16508.
- 752 Oh Y, Zuwala JC, Salvagno CM, Tilbrook GA (2022) The Impact of Pitch and Timbre Cues on Auditory  
753 Grouping and Stream Segregation. *Front Neurosci* 15:725093.
- 754 Rezaeizadeh M, Shamma S (2021) Binding the Acoustic Features of an Auditory Source through Temporal  
755 Coherence. *Cereb Cortex Commun* 2(4):tgab060.
- 756 Saleem KS, Logothetis NK (2012) A Combined MRI and Histology Atlas of the Rhesus Monkey Brain in  
757 Stereotaxic Coordinates, 2nd edition. Amsterdam: Academic Press.
- 758 Selezneva E, Gorkin A, Budinger E, Brosch M (2018) Neuronal correlates of auditory streaming in the  
759 auditory cortex of behaving monkeys. *Eur J Neurosci* 48:3234–3245.
- 760 Selezneva E, Gorkin A, Mylius J, Noesselt T, Scheich H, Brosch M (2012) Reaction times reflect subjective  
761 auditory perception of tone sequences in macaque monkeys. *Hear Res* 294:133–142.
- 762 Shamma SA, Elhilali M, Micheyl C (2011) Temporal coherence and attention in auditory scene analysis.  
763 *Trends Neurosci* 34:114–123.
- 764 Stark E, Abeles M (2007) Predicting Movement from Multiunit Activity. *J Neurosci* 27:8387–8394.
- 765 Steinschneider M, Tenke CE, Schroeder CE, Javitt DC, Simpson GV, Arezzo JC, Vaughan HG (1992) Cellular  
766 generators of the cortical auditory evoked potential initial component. *Electroencephalogr Clin*  
767 *Neurophysiol Potentials Sect* 84:196–200.
- 768 Supèr H, Roelfsema PR (2005) Chronic multiunit recordings in behaving animals: advantages and  
769 limitations. In: *Progress in Brain Research*, 147:263–282.
- 770 Sussman E, Steinschneider M (2009) Attention effects on auditory scene analysis in children.  
771 *Neuropsychologia* 47:771–785.
- 772 Szymanski FD, Garcia-Lazaro JA, Schnupp JWH (2009) Current Source Density Profiles of Stimulus-Specific  
773 Adaptation in Rat Auditory Cortex. *J Neurophysiol* 102:1483–1490.



Banno et al., 2022

774 Tsunada J, Cohen Y, Gold JI (2019) Post-decision processing in primate prefrontal cortex influences  
775 subsequent choices on an auditory decision-making task. *eLife* 8:e46770.

776 Tsunada J, Liu ASK, Gold JI, Cohen YE (2016) Causal contribution of primate auditory cortex to auditory  
777 perceptual decision-making. *Nat Neurosci* 19:135–142.

778 van Noorden LPAS (1975) Temporal coherence in the perception of tone sequences. Eindhoven, The  
779 Netherlands: Institute for Perceptual Research.

780

781

Banno et al., 2022

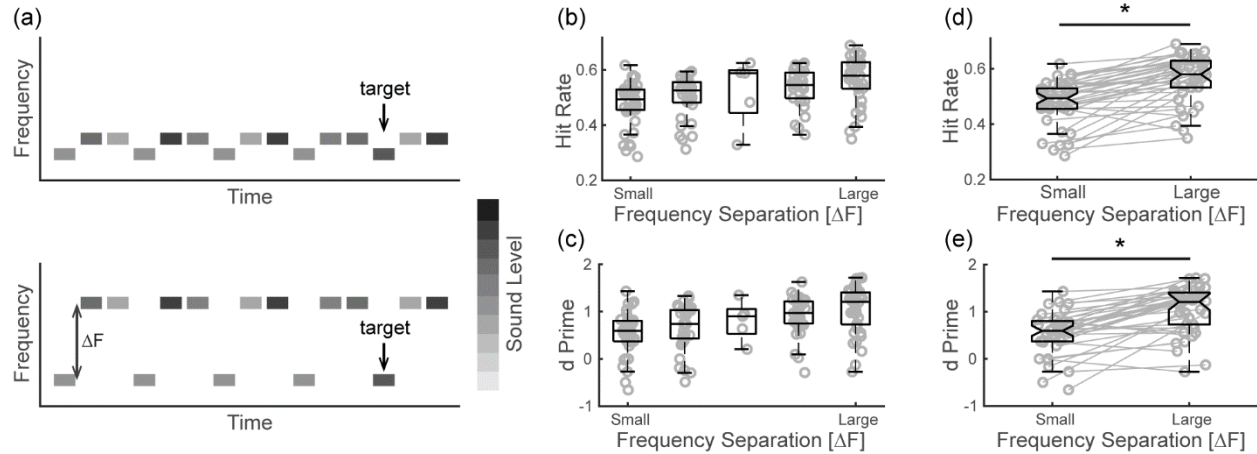

782

783 **Figure 1: Auditory streaming task and behavioral performance to the task.** (a) Schematic illustration of  
784 the auditory streaming task. Each rectangle indicates a low (L) and high (H) frequency tone burst  
785 presented as repeating L-H-H triplets. The grey shading of each rectangle represents the relative sound  
786 level of the tone bursts. The monkeys detected a relatively louder “deviant” target. We varied the  
787 frequency separation ( $\Delta F$ ) between the L and H tone bursts to titrate the task difficulty; target detection  
788 is relatively more difficult in the small  $\Delta F$  trials (top) than in large  $\Delta F$  trials (bottom). (b) Hit rate as a  
789 function of  $\Delta F$ . The gray circles indicate the hit rate from each recording session, and the box plot indicates  
790 the median and upper and lower quantiles of the hit rate across sessions. (c)  $d'$  as a function of  $\Delta F$ . The  
791 gray circles indicate the  $d'$  from each recording session, and the box plot indicates the median and upper  
792 and lower quantiles of the  $d'$  across sessions. (d) Comparison of hit rate between small (typically, 1 and 4  
793 semitone difference for monkey D and C, respectively) and large  $\Delta F$  (typically, 8 and 24 semitone  
794 difference for monkey D and C, respectively) trials. (e) Comparison of  $d'$  between small and large  $\Delta F$  trials.  
795 In (d) and (e), the asterisk indicates significant difference in hit rate and  $d'$ , respectively between the small  
796 and large  $\Delta F$  trials ( $p < 0.05$ , Wilcoxon signed-rank test).  
797

## Core

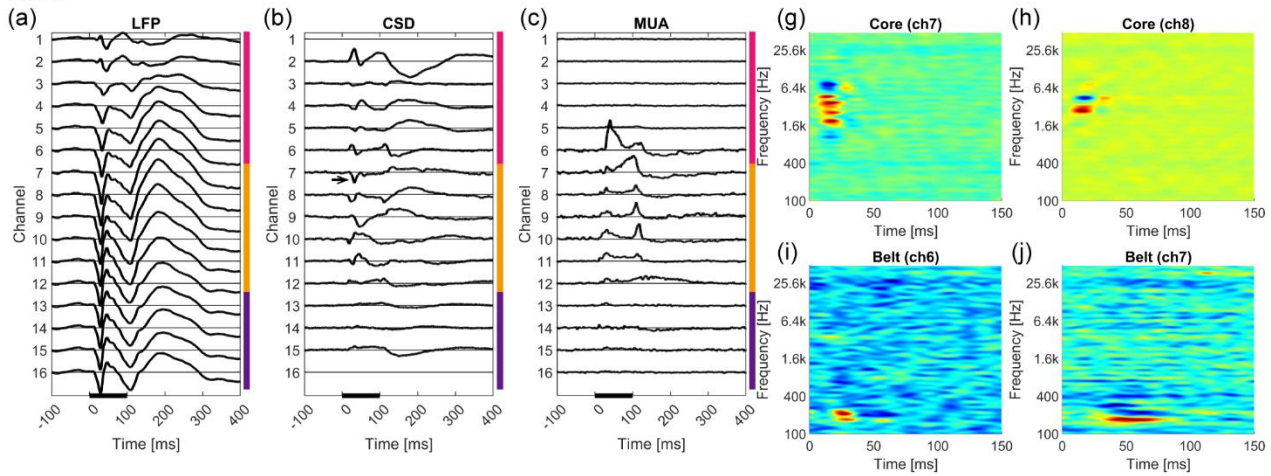

## Belt

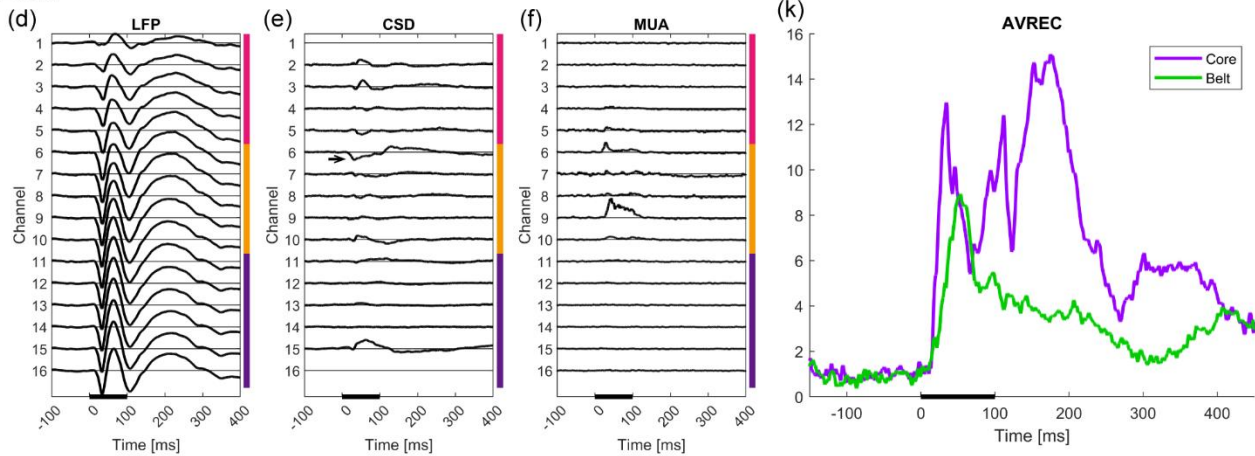

798

799 **Figure 2: Examples of laminar recording from core and belt auditory cortex. (a-c)** Representative  
800 laminar response profiles evoked by a Gaussian noise burst in core auditory cortex: **(a)** local field  
801 potential (LFP), **(b)** the one-dimensional current source density (CSD), and **(c)** multiunit activity (MUA)  
802 are shown as a function of cortical depth from superficial (top) to deep (bottom). The spacing between  
803 channels = 150  $\mu\text{m}$ . The arrow in **(b)** indicates the initial current sink corresponding to the bottom of  
804 layer 3. The vertical color bar indicates the approximate locations of the supragranular (pink), granular  
805 (yellow), and infragranular (purple) layers that were operationally identified from the CSD profile. The  
806 thick black bar at the bottom of each plot indicates the 100-ms duration of a Gaussian noise burst. **(d-f)**  
807 Representative laminar response profiles from belt auditory cortex presented in the same format as in  
808 **(a-c)**. **(g-j)** Representative spectrotemporal receptive fields (STRFs) obtained from the middle channels  
809 of the representative electrodes shown in **(a-f)**. The x-axis is aligned relative to stimulus onset.  
810 Hotter/cooler colors indicate increased/decreased firing rates, respectively. **(k)** The average rectified  
811 CSD (AVREC) from the representative core and belt sites shown in **(a-f)**.

812

Banno et al., 2022

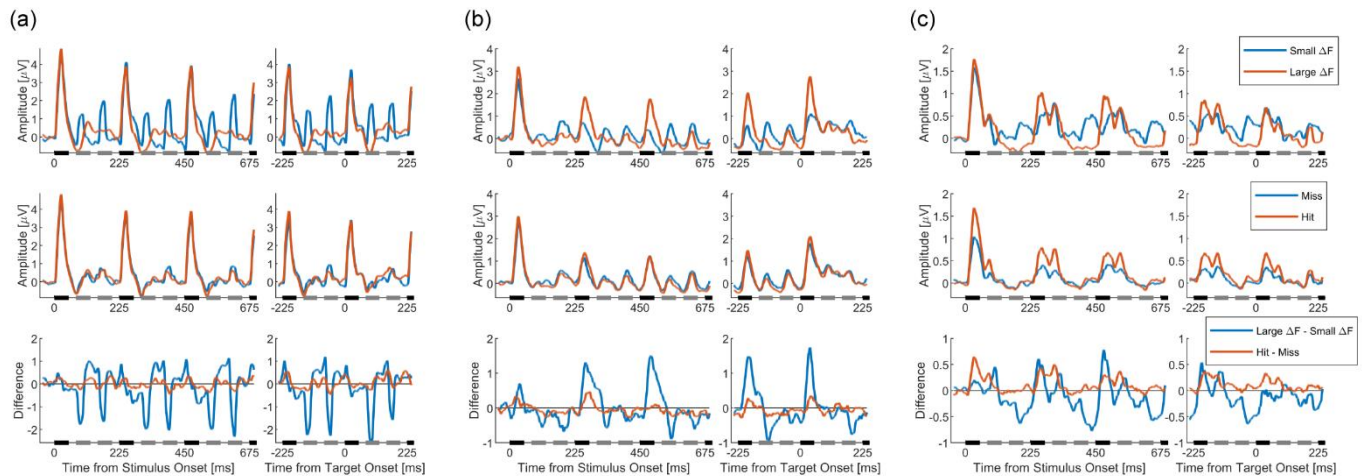

813

814 **Figure 3: Examples of MUA during the auditory streaming task. (a)** A MUA response profile from the core  
815 auditory cortex. **(top)** The mean MUA from trials with the smallest (8 semitone difference) and largest (24  
816 semitone difference) frequency separation. The rectangles on the horizontal axis indicate the  
817 presentation periods of low- (black) and high- (gray) frequency tone bursts. **(middle)** The mean MUA for  
818 hit (red) and miss (blue) trials. **(bottom)** The difference in mean MUA between different stimulus (small  
819  $\Delta F$  versus large  $\Delta F$ ) and choice (hit versus miss) conditions. **(b)** A MUA response profile from the belt  
820 auditory cortex, organized in the same way as in **(a)**. The small and large  $\Delta F$  are 1 and 8 semitone  
821 differences, respectively. **(c)** Another MUA response profile from the core auditory cortex, organized in  
822 the same way as in **(a)**. The small and large  $\Delta F$  are 4 and 24 semitone differences, respectively. The MUA  
823 is smoothed for the purpose of display.

824

Banno et al., 2022

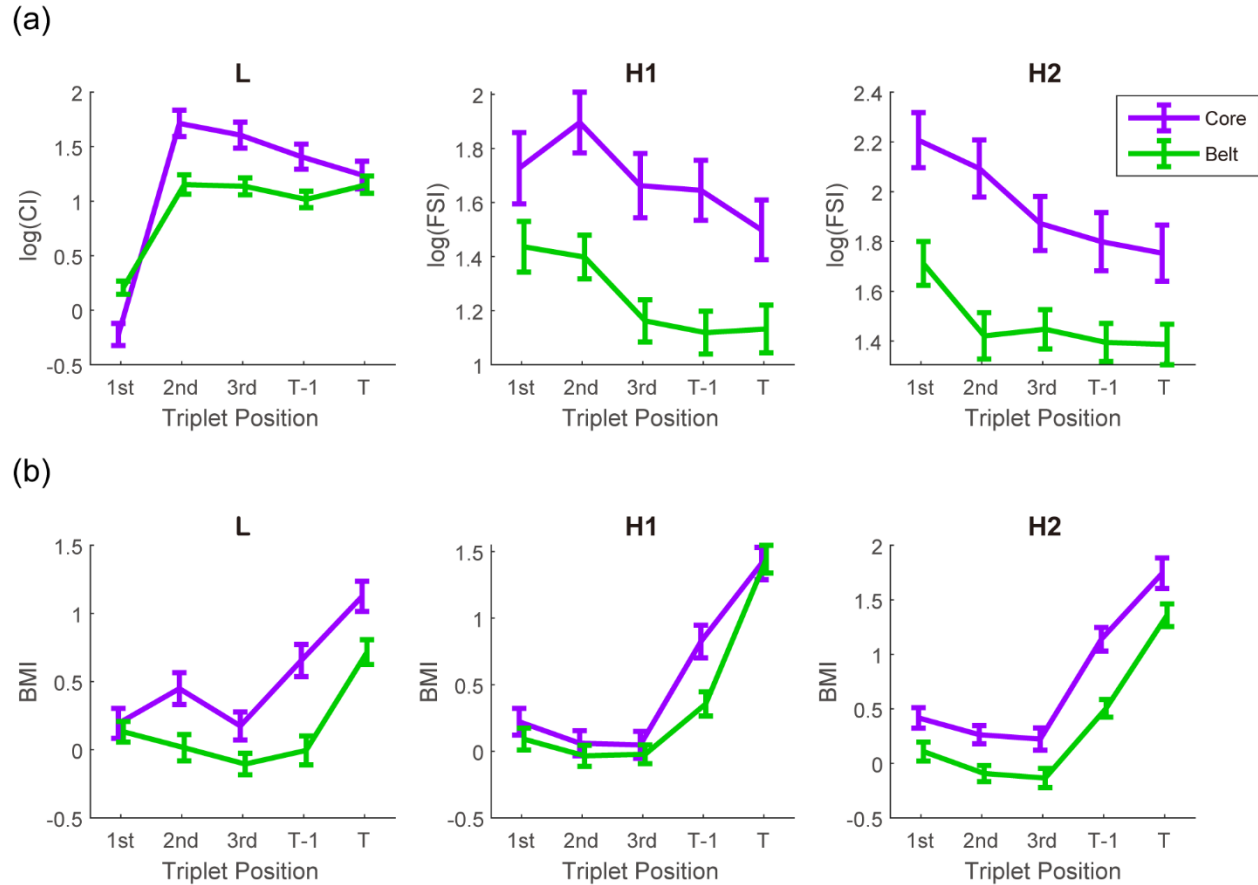

825

826 **Figure 4: Population time course of stimulus- and choice-related MUA modulation, relative to the onset**  
827 **of the tone-burst sequence. (a)** CI values as a function of time (left; only for the low-frequency [L] tone  
828 **burst) and FSI values as a function of time (middle and right; for the two high-frequency tone bursts in the**  
829 **triplet [H1 and H2, respectively]). Data points indicate the population mean and standard error for core**  
830 **(purple) and belt (green) auditory cortex for the first three (“1<sup>st</sup>”, “2<sup>nd</sup>”, and “3<sup>rd</sup>”) triplet positions and for**  
831 **the triplet immediately preceding the target (i.e., “T-1”) and the triplet that included the target (“T”). (b)**  
832 **BMI values as a function of time for L, H1, and H2. Population data are plotted analogous to that shown**  
833 **in (a).**

834

Banno et al., 2022

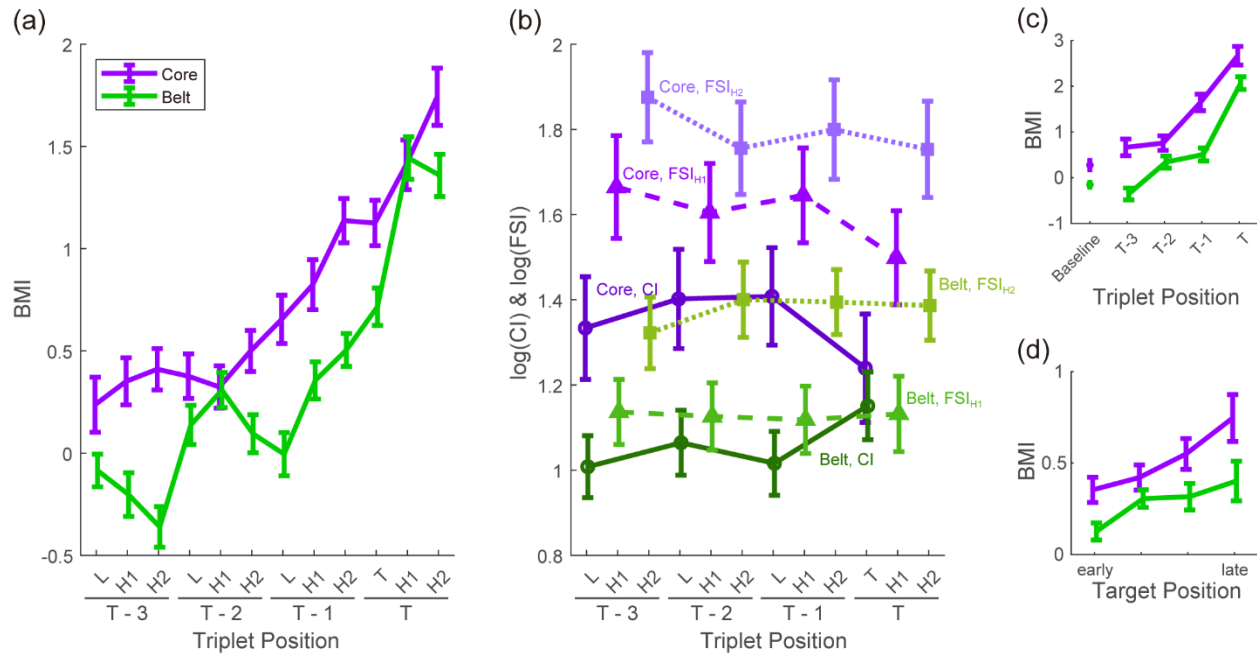

835

836 **Figure 5: Stimulus- and behavior-related modulation, relative to target onset.** (a) BMI values replotted  
837 as a function of target onset, starting with the three triplets preceding target onset (respectively, "T-3",  
838 "T-2", and "T-1") and the target triplet ("T"). (b) CI and FSI values replotted as a function of target onset  
839 in a manner analogous to that done in (a). (c) BMI values calculated across an entire 225-ms triplet window  
840 and plotted as a function of target onset. For comparison, we plot the BMI values generated during a  
841 baseline period (3<sup>rd</sup> triplet position) as well. (d) BMI values for target times that occurred "early" (typically  
842 4<sup>th</sup> and 7<sup>th</sup> triplet for monkey D and monkey C, respectively) in a tone-burst sequence versus those that  
843 occurred "late" (typically 7<sup>th</sup> and 10<sup>th</sup> triplet in monkey D and monkey C, respectively). In all panels, data  
844 points indicate the population mean and standard error.

845

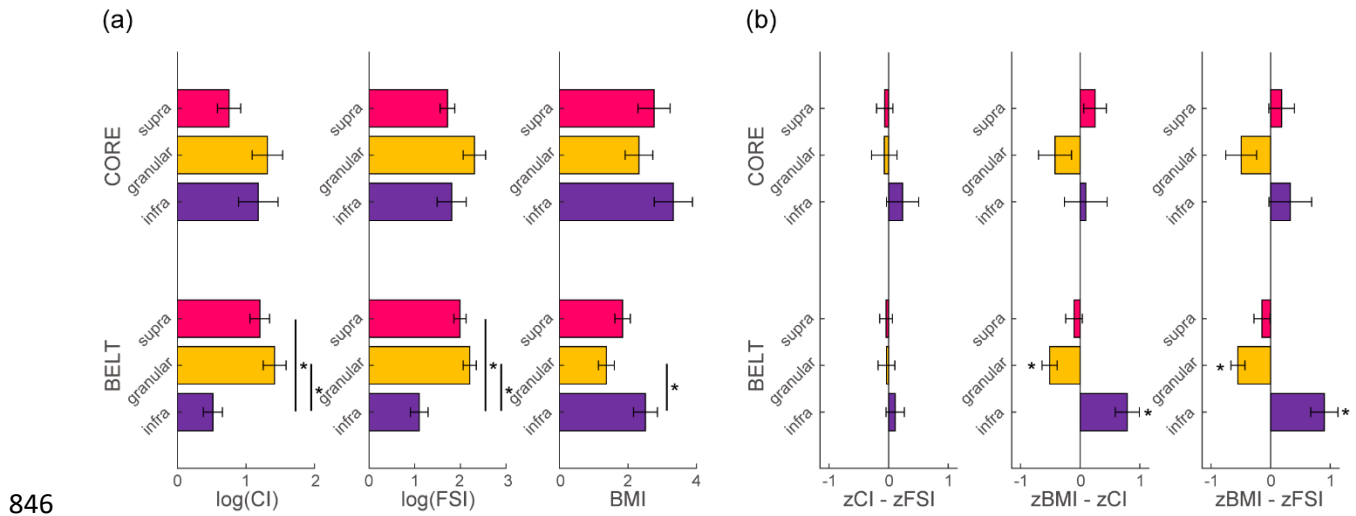

847 **Figure 6: Comparisons of stimulus and behavior-related modulations across layers. (a)** Laminar  
848 distributions of CI, FSI, and BMI values in core and belt. The mean and standard error of these indices are  
849 plotted separately for the supragranular (pink), granular (yellow) and infragranular (purple) layers.  
850 Asterisks indicate the laminar differences with statistically significant ( $p < 0.05$ ; Dunn test) median values.  
851 **(b)** Laminar distributions of z-scored CI, FSI and BMI values in core and belt. Bar graphs indicate mean and  
852 standard error. The asterisks indicate values that are significantly different from zero ( $p < 0.05$ ; Wilcoxon  
853 signed-rank test with Bonferroni correction). For both panels, the CI and FSI were calculated from the  
854 triplet immediately preceding the target, whereas the BMI was calculated from the response in the triplet  
855 that included the target.
